# Supplementary material for: A Multidisciplinary Fingerprinting Approach for Authenticity and Geographical Traceability of Portuguese Wines
Source: MDPI journal article supplement (doi:10.3390/foods10051044), 2021-05-11
Supplement: s1 [file s1]

## Supplementary data

**Table S1.**  $^{87}\text{Sr}/^{86}\text{Sr}$  ratios for wine, soil and rock samples from selected Portuguese vineyards

| Demarcated region | Vineyards                            | Grape variety    | Geology                                | Wine                            |            | Soil                            |            | Rock                            |            |
|-------------------|--------------------------------------|------------------|----------------------------------------|---------------------------------|------------|---------------------------------|------------|---------------------------------|------------|
|                   |                                      |                  |                                        | $^{87}\text{Sr}/^{86}\text{Sr}$ | 2 $\sigma$ | $^{87}\text{Sr}/^{86}\text{Sr}$ | 2 $\sigma$ | $^{87}\text{Sr}/^{86}\text{Sr}$ | 2 $\sigma$ |
| Vinho Verde       | Quinta da Torre de Bardo - Monção    | Alvarinho        | Biotite granite                        | 0.719349                        | 0.000022   | 0.753405                        | 0.000020   | 0.748155                        | 0.000025   |
| Vinho Verde       | Quinta de Muros Antigos - Melgaço    | Alvarinho        | Two-mica granite                       | 0.713981                        | 0.000024   | 0.779035                        | 0.000019   | 0.783222                        | 0.000020   |
| Douro             | Estrada da Capela - Seixo de Ansiães | Touriga Nacional | Two-mica granite                       | 0.719199                        | 0.000046   | 0.779225                        | 0.000034   | 0.770011                        | 0.000028   |
| Douro             | Quinta do Portal - Celeirós          | Touriga Nacional | Metasediment from Desejosa Formation   | 0.718108                        | 0.000030   | 0.740815                        | 0.000031   | 0.739819                        | 0.000036   |
| Douro             | Quinta do Portal - Celeirós          | Moscatel Galego  | Metasediment from Desejosa Formation   | 0.715493                        | 0.000016   | 0.757269                        | 0.000026   | 0.766515                        | 0.000025   |
| Douro             | Quinta do Portal - Celeirós          | Touriga Franca   | Metasediment from Desejosa Formation   | 0.716454                        | 0.000019   | 0.751334                        | 0.000018   | 0.727938                        | 0.000020   |
| Douro             | Quinta do Confradeiro - Celeirós     | Touriga Nacional | Metasediment from Desejosa Formation   | 0.719856                        | 0.000020   | 0.757056                        | 0.000020   | 0.764387                        | 0.000015   |
| Douro             | Quinta dos Muros - Alijó             | Touriga Franca   | Metasediment from Pinhão Formation     | 0.721478                        | 0.000017   | 0.739361                        | 0.000024   | 0.734324                        | 0.000022   |
| Douro             | Quinta da Abelheira - Alijó          | Alvarinho        | Metasediment from Rio Pinhão Formation | 0.719344                        | 0.000014   | 0.728944                        | 0.000020   | 0.728796                        | 0.000019   |
| Douro             | Quinta da Abelheira - Alijó          | Moscatel Galego  | Metasediment from Rio Pinhão Formation | 0.720706                        | 0.000017   | 0.752811                        | 0.000023   | 0.739859                        | 0.000022   |

|       |                                |                  |                                              |          |          |          |          |          |          |
|-------|--------------------------------|------------------|----------------------------------------------|----------|----------|----------|----------|----------|----------|
| Douro | Quinta da Abelheira -<br>Alijó | Touriga Nacional | Metasediment<br>from Rio Pinhão<br>Formation | 0.721116 | 0.000019 | 0.751095 | 0.000029 | 0.755171 | 0.000015 |
|-------|--------------------------------|------------------|----------------------------------------------|----------|----------|----------|----------|----------|----------|

**Table S2.** Particle size distribution in soils from from selected Portuguese vineyards

| Demarcated region | Vineyards                         | Grape variety    | Geology                                | Clay (g/kg)  | Silt (g/kg)       | Fine sand (g/kg) | Coarse sand (g/kg) | Soil texture |
|-------------------|-----------------------------------|------------------|----------------------------------------|--------------|-------------------|------------------|--------------------|--------------|
|                   |                                   |                  |                                        | (< 0.002 mm) | (0.002 – 0.02 mm) | (0.02 – 0.2 mm)  | (0.2 – 2 mm)       |              |
| Vinho Verde       | Quinta da Torre de Bardo - Monção | Alvarinho        | Biotite granite                        | 97           | 129               | 213              | 562                | Sandy loam   |
| Vinho Verde       | Quinta de Muros Antigos - Melgaço | Alvarinho        | Two-mica granite                       | 77           | 110               | 191              | 622                | Loamy sand   |
| Douro             | Quinta do Confradeiro - Celeirós  | Touriga Nacional | Metasediment from Desejosa Formation   | 108          | 165               | 316              | 412                | Sandy loam   |
| Douro             | Quinta da Abelheira - Alijó       | Touriga Nacional | Metasediment from Rio Pinhão Formation | 112          | 231               | 399              | 257                | Sandy loam   |

**Table S3.**  $^{206}\text{Pb}/^{204}\text{Pb}$ ,  $^{207}\text{Pb}/^{204}\text{Pb}$  and  $^{208}\text{Pb}/^{204}\text{Pb}$  ratios for bedrock samples from selected Portuguese vineyards

| Demarcated region | Vineyards                         | Grape variety    | Geology                                | Rock                              |            |                                   |            |                                   |            |
|-------------------|-----------------------------------|------------------|----------------------------------------|-----------------------------------|------------|-----------------------------------|------------|-----------------------------------|------------|
|                   |                                   |                  |                                        | $^{206}\text{Pb}/^{204}\text{Pb}$ | 2 $\sigma$ | $^{207}\text{Pb}/^{204}\text{Pb}$ | 2 $\sigma$ | $^{208}\text{Pb}/^{204}\text{Pb}$ | 2 $\sigma$ |
| Vinho Verde       | Quinta da Torre de Bardo - Monção | Alvarinho        | Biotite granite                        | 19.2859                           | 0.0006     | 15.6930                           | 0.0006     | 39.0449                           | 0.0018     |
| Vinho Verde       | Quinta de Muros Antigos - Melgaço | Alvarinho        | Two-mica granite                       | 19.0647                           | 0.0007     | 15.6922                           | 0.0006     | 38.7425                           | 0.0018     |
| Douro             | Quinta do Portal - Celeirós       | Touriga Franca   | Metasediment from Desejosa Formation   | 18.3067                           | 0.0009     | 15.6797                           | 0.0008     | 39.1033                           | 0.0022     |
| Douro             | Quinta do Confradeiro - Celeirós  | Touriga Nacional | Metasediment from Desejosa Formation   | 18.3871                           | 0.0008     | 15.6687                           | 0.0008     | 39.0905                           | 0.0023     |
| Douro             | Quinta dos Muros - Alijó          | Touriga Franca   | Metasediment from Pinhão Formation     | 18.4169                           | 0.0008     | 15.6475                           | 0.0007     | 38.8575                           | 0.0020     |
| Douro             | Quinta da Abelheira - Alijó       | Alvarinho        | Metasediment from Rio Pinhão Formation | 18.5655                           | 0.0010     | 15.6653                           | 0.0009     | 39.0449                           | 0.0025     |
| Douro             | Quinta da Abelheira - Alijó       | Touriga Nacional | Metasediment from Rio Pinhão Formation | 18.5879                           | 0.0009     | 15.6570                           | 0.0009     | 39.2372                           | 0.0026     |

**Table S4.**  $^{206}\text{Pb}/^{204}\text{Pb}$ ,  $^{207}\text{Pb}/^{204}\text{Pb}$  and  $^{208}\text{Pb}/^{204}\text{Pb}$  ratios for wine samples from selected Portuguese vineyards

| Demarcated region | Vineyards                         | Grape variety    | Geology                                | Wine                              |            |                                   |            |                                   |            |
|-------------------|-----------------------------------|------------------|----------------------------------------|-----------------------------------|------------|-----------------------------------|------------|-----------------------------------|------------|
|                   |                                   |                  |                                        | $^{206}\text{Pb}/^{204}\text{Pb}$ | 2 $\sigma$ | $^{207}\text{Pb}/^{204}\text{Pb}$ | 2 $\sigma$ | $^{208}\text{Pb}/^{204}\text{Pb}$ | 2 $\sigma$ |
| Vinho Verde       | Quinta da Torre de Bardo - Monção | Alvarinho        | Biotite granite                        | 18.4441                           | 0.0008     | 15.6264                           | 0.0007     | 38.3963                           | 0.0021     |
| Vinho Verde       | Quinta de Muros Antigos - Melgaço | Alvarinho        | Two-mica granite                       | 18.5474                           | 0.0010     | 15.6601                           | 0.0010     | 38.5834                           | 0.0025     |
| Douro             | Quinta do Portal - Celeirós       | Touriga Franca   | Metasediment from Desejosa Formation   | 18.7577                           | 0.0012     | 15.6357                           | 0.0011     | 38.6669                           | 0.0029     |
| Douro             | Quinta do Confradeiro - Celeirós  | Touriga Nacional | Metasediment from Desejosa Formation   | 18.7834                           | 0.0010     | 15.6290                           | 0.0009     | 38.6760                           | 0.0023     |
| Douro             | Quinta dos Muros - Alijó          | Touriga Franca   | Metasediment from Pinhão Formation     | 18.7825                           | 0.0010     | 15.6244                           | 0.0009     | 38.6557                           | 0.0023     |
| Douro             | Quinta da Abelheira - Alijó       | Alvarinho        | Metasediment from Rio Pinhão Formation | 18.7847                           | 0.0008     | 15.6699                           | 0.0008     | 38.8573                           | 0.0020     |
| Douro             | Quinta da Abelheira - Alijó       | Touriga Nacional | Metasediment from Rio Pinhão Formation | 18.7505                           | 0.0010     | 15.6310                           | 0.0010     | 38.6888                           | 0.0026     |
